# Supplementary material for: Duck Enteritis Virus Protein Kinase US3 Inhibits DNA Sensing Signaling by Phosphorylating Interferon Regulatory Factor 7
Source: PubMed Central journal article supplement (PMC9769898; doi:10.1128/spectrum.02299-22), 2022-10-26
Supplement: spectrum.02299-22-s0001.pdf [file spectrum.02299-22-s0001.pdf]

**TABLE S1** Sequences of primers used in the quantitative real-time PCR assay.

| Primer name      | Sequence (5' – 3')      |
|------------------|-------------------------|
| IFN- $\beta$ -F  | TCTACAGAGCCTTGCCTGCAT   |
| IFN- $\beta$ -R  | TGTCGGTGTCCAAAAGGATGT   |
| IL-6-F           | TTCGACGAGGAGAAATGCTT    |
| IL-6-R           | CCTTATCGTCGTTGCCAGAT    |
| Mx-F             | TGCTGTCC TTCATGACTTCG   |
| Mx-R             | GCTTTGCTGAGCCGATTAAC    |
| OASL-F           | TCTTCCTCAGCTGCTTCTCC    |
| OASL-R           | ACTTCGATGGACTCGCTGTT    |
| $\beta$ -actin-F | GATCACAGCCCTGGCACC      |
| $\beta$ -actin-R | CGGATTCATCATACTCCTGCTT  |
| DEV-UL30-F       | TTTCCTCCTCCTCGCTGAGTG   |
| DEV-UL30-R       | CCAGAAACATACTGTGAGAGT   |
| HVT-UL30-F       | TGCAGAACAAAGAGTATTCCGTA |
| HVT-UL30-R       | CATCCCCTATCTTTACTAGCC   |
| GAPDH-F          | GTCAACGGATTTGGCCGTAT    |
| GAPDH-R          | CCACTTGGACTTTGCCAGAGA   |
